# Supplementary material for: FRET-Based Semiconducting Polymer Dots for pH Sensing
Source: MDPI journal article supplement (doi:10.3390/s19061455), 2019-03-25
Supplement: s1 [file s1]

## Supplementary Materials

# FRET-based semiconducting polymer dots for pH sensing

Jiemei Ou <sup>1,2,†</sup>, Huijun Tan <sup>1,†</sup>, Zhong Chen <sup>1,\*</sup> and Xudong Chen <sup>1,\*</sup>

<sup>1</sup> Key Laboratory for Polymeric Composite and Functional Materials of Ministry of Education, Guangdong Engineering Technology Research Center for High-Performance Organic and Polymer Photoelectric Functional Films, School of Chemistry, Sun Yat-sen University, Guangzhou 510275, China; chenzhong@mail.sysu.edu.cn

<sup>2</sup> National Engineering Research Center for Healthcare Devices, Guangdong Key Lab of Medical Electronic Instruments and Polymer Material Products, Guangdong Institute of Medical Instruments, Guangzhou, 510500, China; oujiemei12@163.com

\* Correspondence: chenzhong@mail.sysu.edu.cn (Z.C.); cesxcd@mail.sysu.edu.cn (X.C.); Tel.: +86-189-9838-2617(Z.C.); +86-138-0293-7231(X.C.)

† These authors made equal contributions.

## Additional Figures

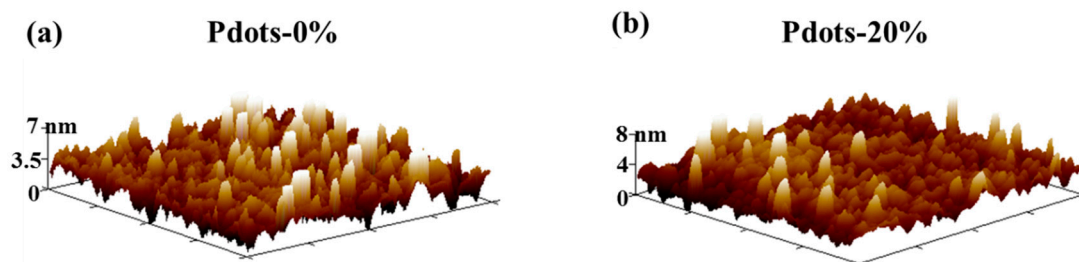

Figure S1. The 3D morphologic images of Pdots-0% (a) and Pdots-20% (b).

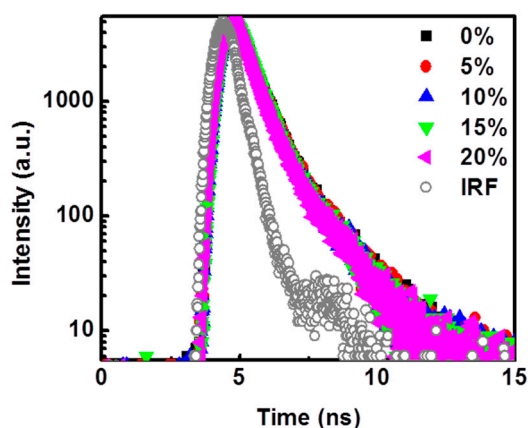

Figure S2. Time-resolved fluorescence spectra of Pdots doped with different BDMO-PPV contents.

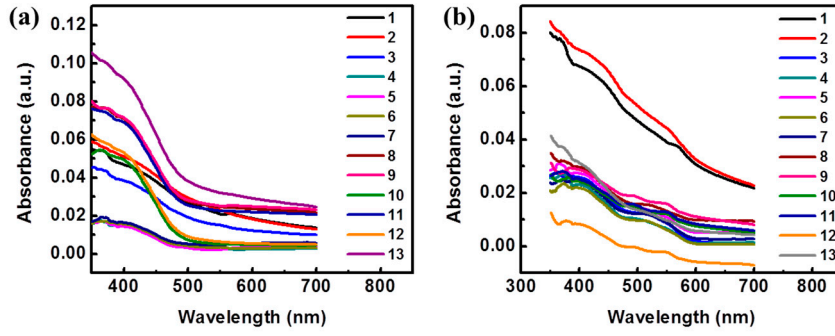

Figure S3. Absorption spectra of Pdots-0% and Pdots-20% at various pH values.

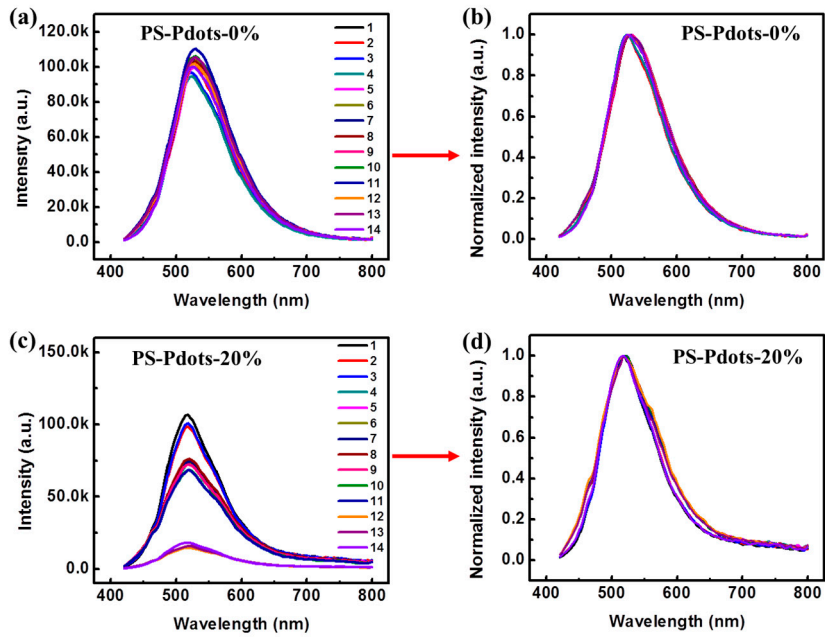

Figure S4. Fluorescence spectra of the reference system comprising PFV as the donor and BDMO-PPV as the acceptor and adding PS as matrix under various pH values: (a,b) PS-Pdots-0%; (c,d) PS-Pdots-20%.

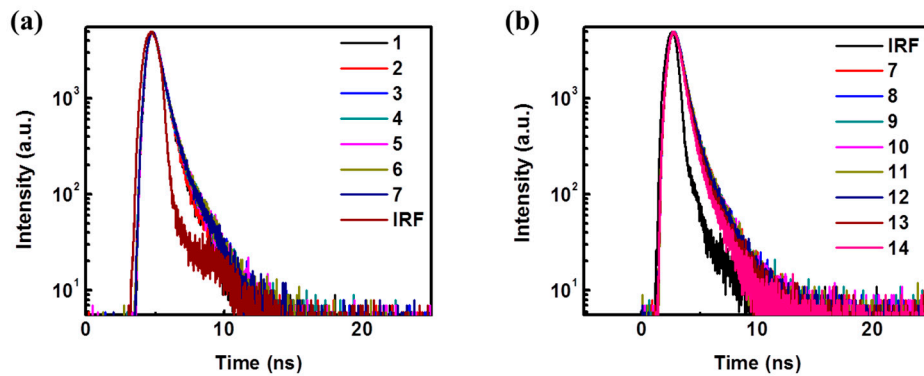

Figure S5. Time-resolved fluorescence spectra of Pdots-20% under various pH values.

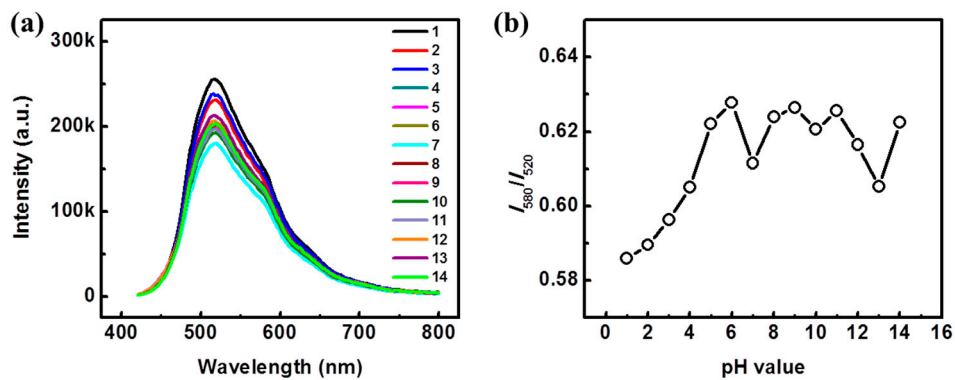

**Figure S6.** Fluorescence properties of Pdots-2% at various pH: (a) Fluorescence spectra; (b) Plot of the relative fluorescence intensity ratios ( $I_{580}/I_{520}$ ) in response to pH values.
